# Supplementary material
Source: Springer Nature journal article supplement (https://www.springermedizin.de/resource/supplementary/12885_2013_5203_MOESM9_ESM.pdf/9466448)

ATO/BSO

ROS

ASK1

P

JNK

JNK<sup>P</sup>

MCL1<sup>P</sup>

BIM<sup>P</sup>

MCL1

BIM

• Cytochrome c

BIM<sup>P</sup>

BIM<sup>P</sup>

BAX

BAX

BAX

BAX

BAX

BAX

Cytochrome c  
release

Apoptosis

Activation of  
caspase-9 and 3

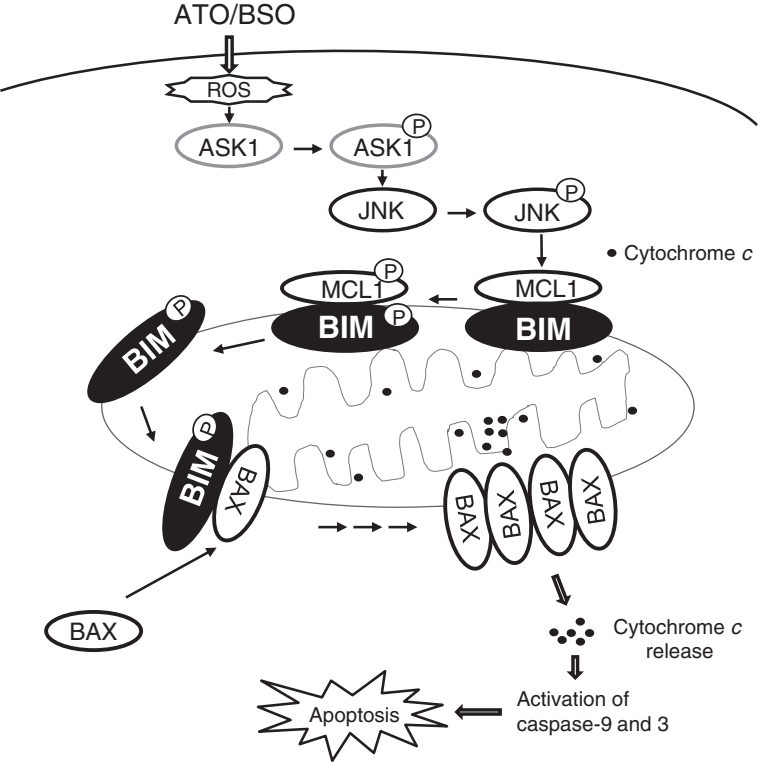

Supplement: MOESM9 [file 9466448]
